# Supplementary material
Source: PubMed Central journal article supplement (PMC31119)
Supplement: pnas_051608498_6.pdf [file pnas_051608498_6.pdf]

**Table 7.** Proton-1 chemical shifts (ppm) for the A-loop RNA oligonucleotide at 15°C, pH 7.0

| Position | H6/H8 | H2/H5 | H1'  | H2'  | H3' | H4' | H5'/5'' | Imino | Amino |
|----------|-------|-------|------|------|-----|-----|---------|-------|-------|
| G1       | 8.11  | -     |      |      |     |     |         |       |       |
| G2       | 7.69  | -     |      |      |     |     |         |       |       |
| C3       | 7.71  | 5.31  |      |      |     |     |         |       |       |
| U4       | 7.88  | 5.50  |      |      |     |     |         |       |       |
| G5       | 7.77  | -     |      |      |     |     |         |       |       |
| G6       | 7.35  | -     |      |      |     |     |         |       |       |
| C7       | 7.35  | 5.11  |      |      |     |     |         |       |       |
| U8       | 7.60  | 5.49  |      |      |     |     |         |       |       |
| G9       | 7.79  | -     | 5.61 | 4.68 |     |     |         |       |       |
| U10      | 7.75  | 5.75  | 5.91 | 4.32 |     |     |         |       |       |
| U11      | 7.74  | 5.82  | 5.90 | 4.48 |     |     |         |       |       |
| C12      | 7.83  | 5.82  | 5.90 | 4.60 |     |     |         |       |       |
| G13      | 7.94  | -     |      |      |     |     |         |       |       |
| C14      | 7.82  | 5.35  |      |      |     |     |         |       |       |
| C15      | 7.79  | 5.63  |      |      |     |     |         |       |       |
| A16      | 8.08  | 7.00  |      |      |     |     |         |       |       |
| G17      | 7.34  | -     |      |      |     |     |         |       |       |
| C18      | 7.61  | 5.20  |      |      |     |     |         |       |       |
| C19      | 7.68  | 5.53  |      |      |     |     |         |       |       |
