# Supplementary material
Source: PubMed Central journal article supplement (PMC31119)
Supplement: pnas_051608498_7.pdf [file pnas_051608498_7.pdf]

**Table 8.** Carbon-13 chemical shifts (ppm) for uniformly labeled A-loop RNA oligonucleotide at 15°C, pH 7.0

| Position | C6/C8  | C2/C5  | C1'   | C2'   | C3'   | C4'   | C5'   |
|----------|--------|--------|-------|-------|-------|-------|-------|
| G1       | 134.21 | -      | 86.70 | 70.57 | 70.95 | 79.32 | 63.07 |
| G2       | 132.68 | -      | 88.71 | 71.15 | 68.83 | 78.32 | 60.32 |
| C3       | 136.17 | 92.88  | 89.26 | 67.76 | 70.91 | 77.60 | 60.18 |
| U4       | 137.29 | 99.63  | 89.78 | 70.94 | 68.11 | 77.50 | 60.31 |
| G5       | 132.04 | -      | 88.12 | 71.06 | 68.74 | 77.70 | 61.48 |
| G6       | 131.75 | -      | 88.44 | 71.07 | 68.13 | 77.50 | 60.83 |
| C7       | 136.13 | 93.02  | 89.50 | 71.07 | 67.89 | 77.60 | 60.16 |
| U8       | 136.74 | 100.06 | 89.43 | 71.29 | 69.17 | 78.60 | 61.40 |
| G9       | 135.81 | -      | 86.23 | 70.33 | 72.32 | 80.36 | 62.42 |
| U10      | 139.57 | 101.02 | 85.74 | 71.32 | 73.06 | 80.92 | 63.39 |
| U11      | 139.48 | 101.02 | 86.61 | 70.91 | 72.33 | 80.52 | 63.51 |
| C12      | 138.63 | 94.04  | 88.72 | 71.06 | 71.71 | 78.80 | 63.68 |
| G13      | 133.42 | -      | 89.05 | 70.66 | 69.69 | 78.51 | 63.02 |
| C14      | 137.22 | 92.59  | 89.73 | 88.07 | 67.94 | 77.60 | 60.21 |
| C15      | 136.68 | 93.93  | 89.76 | 71.09 | 70.97 | 77.60 | 60.24 |
| A16      | 135.23 | 148.20 | 88.55 | 71.29 | 68.59 | 77.60 | 60.89 |
| G17      | 131.46 | -      | 88.38 | 70.89 | 71.06 | 77.60 | 61.04 |
| C18      | 136.58 | 92.71  | 89.78 | 71.26 | 67.58 | 77.50 | 59.96 |
| C19      | 137.38 | 94.01  | 88.64 | 73.20 | 65.73 | 79.96 | 60.71 |
